# Supplementary material for: The CDPK Gene Family in Mustard (Brassica juncea L.): Genome-Wide Identification and Expression Analysis under Cold Stress
Source: Preprints.org preprint supplement (doi:10.20944/preprints202311.0465.v1), 2023-11-07
Supplement: Supplementary file 1 [file supplementary]

| Domain | E-value   | Sites | Width | Multilevel consensus sequence |
|--------|-----------|-------|-------|-------------------------------|
| 1.     | 1.2e-3233 | 97    | 50    |                               |
| 2.     | 1.3e-3900 | 99    | 50    |                               |
| 3.     | 7.5e-3394 | 99    | 41    |                               |
| 4.     | 3.4e-954  | 91    | 21    |                               |
| 5.     | 2.9e-4483 | 98    | 50    |                               |
| 6.     | 1.2e-3488 | 100   | 50    |                               |
| 7.     | 8.1e-3298 | 92    | 50    |                               |
| 8.     | 7.9e-797  | 101   | 15    |                               |
| 9.     | 3.6e-3586 | 99    | 50    |                               |
| 10.    | 9.1e-2107 | 97    | 41    |                               |

**Figure S1.** Motif analysis of BjuCDPKs using MEME
