# Supplementary material for: The CDPK Gene Family in Mustard (Brassica juncea L.): Genome-Wide Identification and Expression Analysis under Cold Stress
Source: Preprints.org preprint supplement (doi:10.20944/preprints202311.0465.v1), 2023-11-07
Supplement: Supplementary file 1 [file supplementary]

## Sheet: Sheet1
Table S4 TPM values of 101 BjuCDPK genes under cold treatment
Gene	0 h-1	0 h-2	0 h-3	1 h-1	1 h-2	1 h-3	3 h-1	3 h-2	3 h-3	6 h-1	6 h-2	6 h-3	10 h-1	10 h-2	10 h-3	24 h-1	24 h-2	24 h-3
BjuCDPK1	0.270595	0.151112	0.948729	0.04134	0.082262	0.087065	0.378395	0.129552	0.177437	0	0.435913	0	0.149181	0.09763	0.129973	0.421403	0.192839	0.252769
BjuCDPK2	93.3432	43.5319	176.71	42.6802	44.068	43.5093	62.2606	52.0325	57.8614	72.2807	99.9509	90.8262	91.6204	85.0253	63.8311	122.843	89.2191	111.366
BjuCDPK3	4.9575	2.73997	2.9359	4.52872	3.19811	1.08301	7.38555	3.88983	3.3181	2.01134	1.19895	1.38801	3.38492	3.01251	1.52216	2.98832	3.54651	6.64927
BjuCDPK4	16.4789	9.22129	16.7225	22.5876	21.0635	12.911	14.5244	10.7912	15.6104	14.04	15.2106	16.9406	16.5834	17.7879	13.0849	20.6487	16.2223	16.44
BjuCDPK5	0	0	0	0	0	0.089591	0.107631	0	0.063462	0.073955	0	0.016715	0	0.042542	0	0.254843	0.344691	0.078677
BjuCDPK6	22.0413	9.79754	28.8129	41.3735	31.0801	16.4379	23.4766	19.7013	16.1754	12.141	27.5569	18.6909	22.2739	24.5186	19.0354	25.2702	28.9109	33.3394
BjuCDPK7	7.13109	2.32936	9.72937	6.18518	6.45598	3.24706	3.82277	3.97235	3.84043	3.45382	6.05804	4.77399	4.03405	3.17961	2.84311	6.25383	8.20341	4.14546
BjuCDPK8	7.28392	3.47266	7.17607	7.19059	8.41866	3.9123	6.55493	6.02622	4.51265	1.41527	5.74572	2.06991	3.40314	2.78859	2.56098	7.49764	5.76934	8.61535
BjuCDPK9	0	0	0	0.118459	0	0	0	0	0	0.046295	0.138956	0	0	0	0	0	0.08786	0
BjuCDPK10	0	0.03599	0.039477	0	0	0	0	0.029085	0	0.036288	0.095076	0	0	0.054984	0	0.117391	0	0
BjuCDPK11	1.98133	0.812759	1.2898	0.61786	1.07754	0.530633	0.733022	0.851602	0.766251	0.138684	0.537409	0.41421	1.17446	0.915928	0.491471	1.232	1.14018	0.615728
BjuCDPK12	0	0	0	0	0.023265	0	0	0	0	0	0	0.074719	0	0	0	0	0.153805	0.086894
BjuCDPK13	0	0	0	0	0.153694	0	0	0	0	0	0.088632	0	0	0	0	0	0	0
BjuCDPK14	0	0	0	0	0	0	0	0	0	0	0	0	0	0	0	0	0	0
BjuCDPK15	11.2385	7.76764	12.1089	4.70067	6.22596	3.65057	7.18803	7.29799	10.091	7.32833	4.69814	8.08332	8.94264	9.7966	5.44716	12.9324	10.7124	9.01327
BjuCDPK16	3.88703	2.47044	3.71296	1.18307	1.43005	1.23623	1.46601	2.45705	2.25633	1.18478	2.27307	2.26351	2.47018	1.69349	1.00045	2.83567	3.3983	2.39759
BjuCDPK17	13.7975	6.18071	29.6326	5.41934	7.97064	9.04534	8.68654	15.7504	9.70028	11.1168	6.96834	12.2292	11.1016	10.1901	7.93198	13.8194	15.7861	19.5373
BjuCDPK18	7.53996	5.28024	4.75364	12.8832	17.0373	9.63289	12.0724	8.58143	6.12579	4.14324	5.7475	6.85339	6.75713	7.23684	13.1909	8.26264	6.74723	11.9147
BjuCDPK19	32.3285	13.0873	45.5683	22.2195	20.3623	13.642	17.7948	17.222	29.2447	20.0997	31.3235	23.398	25.4649	26.6036	15.8348	34.2477	31.3158	24.1173
BjuCDPK20	0	0	0	0	0	0.043105	0	0	0	0	0	0	0	0	0	0	0	0.024545
BjuCDPK21	13.0416	6.47697	6.61993	13.7566	16.8641	13.223	19.8926	13.9833	13.5793	6.39847	6.95769	7.29289	12.8412	12.0392	15.2509	8.8363	9.39523	14.2682
BjuCDPK22	0	0	0	0	0	0	0	0	0	0	0	0	0	0	0	0	0	0
BjuCDPK23	0	0	0	0	0	0	0.058724	0	0	0.057797	0	0	0	0	0	0	0	0.065811
BjuCDPK24	0	0	0	0.516937	0.107522	0	0.02656	0	0	0.069602	0.446945	0.06547	0.054429	0.185722	0.070905	0.115879	0.192527	0.078097
BjuCDPK25	0	0	0	0	0	0	0	0	0	0	0	0.030674	0.036981	0	0	0	0.078216	0
BjuCDPK26	5.9151	0.655072	6.84413	2.43315	1.26591	0.916195	1.236	1.80771	2.28011	1.20902	2.41632	3.5476	2.45967	2.2123	1.19752	4.18865	6.24209	2.66296
BjuCDPK27	2.63033	0.500583	0.777036	1.01735	0.809505	0.391953	1.26839	0.785969	0.529531	0.661239	2.07977	1.09172	1.20547	0.978488	0.853374	1.44885	1.73017	1.71983
BjuCDPK28	37.8959	11.8777	40.1189	20.9387	12.9665	5.93733	6.37989	15.7292	23.8834	27.7087	28.3236	41.0315	26.9148	27.3803	10.6981	32.1752	29.1309	20.9203
BjuCDPK29	0	0	0.083365	0.188344	0	0	0	0	0	0	0	0.032589	0	0	0	0	0	0
BjuCDPK30	1.89292	0.202624	2.94676	0.521439	0.671711	0.467073	1.27937	0.942809	0.682817	1.40062	3.88619	2.06849	1.60129	0.926416	1.12417	1.67349	3.42219	1.21898
BjuCDPK31	6.63951	2.57591	7.2897	5.25902	4.68851	4.33525	4.40973	4.90757	4.28705	3.09952	4.92358	3.46098	5.3724	4.05106	3.24505	6.32589	7.41972	5.00183
BjuCDPK32	0.744477	0	0.717866	0.723043	0.217623	0.287806	0.23305	0.116678	0.353797	0.865248	0.455099	1.50639	0.256341	0.132547	0.050506	0.722354	1.28425	0.501818
BjuCDPK33	0	0	0	0	0	0	0	0	0	0	0	0	0	0	0	0.023369	0	0
BjuCDPK34	14.7019	6.82545	31.0179	2.61495	1.74108	1.72118	6.43255	5.15586	5.22001	12.1495	10.2149	9.20471	4.96768	7.6353	4.1319	12.2006	9.54706	8.9121
BjuCDPK35	9.88543	4.24119	16.1422	3.09922	1.83207	0.467407	4.24228	3.80138	2.98805	2.87433	12.0831	4.21373	7.84925	5.03058	2.62663	11.2134	8.75989	7.38365
BjuCDPK36	2.26459	3.30389	0.934562	5.2485	4.36579	3.8758	3.44337	4.52221	2.28855	2.24898	5.66284	3.29533	2.78097	3.38693	3.42177	4.71997	2.17152	4.48858
BjuCDPK37	3.33335	0.632347	1.40119	6.57578	0.448152	2.87665	1.82103	2.4913	2.34811	2.57503	1.96386	4.50023	1.7333	1.8889	1.27887	3.71855	2.35898	4.5504
BjuCDPK38	29.6249	7.6668	33.9226	35.6696	35.6898	25.0966	18.0557	19.8969	18.3103	20.0226	22.0988	20.8755	21.6652	21.1172	16.0535	26.7135	35.8036	22.5979
BjuCDPK39	37.2163	19.1055	61.5868	10.2334	10.2697	11.8967	32.2069	17.2164	20.0218	22.7893	27.2267	16.161	28.6376	27.4941	17.2391	34.5779	25.058	23.9867
BjuCDPK40	0	0	0	0	0	0	0	0	0	0	0	1.21647	0	0	0	0	0	0
BjuCDPK41	1.52801	1.81994	0.946821	0.61022	0.471829	1.43007	1.14746	1.50938	1.17114	0.730758	0.413856	0.583836	0.877866	0.703426	0.354399	1.36123	1.27296	0.728298
BjuCDPK42	6.68214	3.14656	11.8967	4.09905	2.83081	3.0587	12.8466	8.87115	2.764	4.94998	11.2978	4.10787	10.0858	7.87456	7.59385	16.5822	11.3183	19.7009
BjuCDPK43	7.56086	2.86375	9.05833	9.5024	10.9975	4.79598	6.36297	5.13853	5.46632	2.53175	6.32121	4.33648	6.82287	5.69271	6.17669	5.64955	6.10883	6.37252
BjuCDPK44	4.06206	1.26586	6.16868	2.47562	2.72537	2.15343	2.64218	2.33742	2.96068	2.5406	3.54643	3.66886	2.83811	3.59287	2.13667	6.23634	5.95829	3.94323
BjuCDPK45	0.220676	0	0.093061	0	0.523025	0	0.05329	0	0.092355	0.120852	0.14902	0.080913	0	0.108171	0.076718	0	0.290078	0.400376
BjuCDPK46	16.5827	11.2627	26.6457	27.2877	28.6212	17.8053	23.322	19.3635	17.276	18.4111	20.2745	18.643	18.2578	17.679	18.8864	24.9748	20.7346	23.3454
BjuCDPK47	0	0	0	0	0	0	0	0	0	0	0	0	0	0	0	0	0	0
BjuCDPK48	13.2971	5.02988	18.1206	7.69119	9.10524	4.94777	9.83043	9.29696	9.08758	5.54235	7.85447	7.70098	11.9544	8.72498	6.99163	16.3992	13.5027	12.4147
BjuCDPK49	0	0.059649	0	0.162232	0.179276	0.219993	0.093515	0.162797	0.080447	0.203938	0.049801	0.069286	0.075996	0.009932	0.207259	0.059856	0.080582	0.292594
BjuCDPK50	25.9588	8.38764	45.009	7.46896	8.85201	4.89844	6.30257	9.46261	11.3659	11.7398	20.1884	14.8469	13.2383	11.9699	3.91068	24.6949	22.3229	8.1092
BjuCDPK51	0	0	0	0	0	0	0	0	0	0	0	0	0	0	0	0	0	0
BjuCDPK52	0	0	0	0.061282	0	0	0	0	0	0	0	0	0	0	0	0	0	0
BjuCDPK53	0	0	0	0	0	0	0	0	0	0	0.062878	0.03642	0	0	0	0	0	0
BjuCDPK54	7.13596	2.03547	9.56772	3.39211	2.31954	0.905485	2.39459	3.46505	2.79994	2.43063	8.37824	5.58145	5.52184	3.32289	2.18667	6.51395	7.55837	6.3666
BjuCDPK55	12.8867	5.08219	14.8563	3.60269	3.95956	3.2401	7.40848	6.44124	6.67385	4.48102	10.5119	6.56587	6.72819	6.09222	4.91294	12.2012	10.6038	8.18123
BjuCDPK56	0	0	0	0	0	0	0	0	0	0	0	0.037085	0.040735	0	0.029478	0	0	0.03808
BjuCDPK57	26.944	20.9374	31.8428	33.9141	34.502	24.0012	25.8741	29.4743	22.7923	33.3397	18.1536	34.1362	28.1615	23.5219	21.7862	32.0517	29.5518	31.1214
BjuCDPK58	0	0	0	0	0	0	0	0	0	0	0	0	0	0	0.027876	0	0	0
BjuCDPK59	7.17312	4.25376	5.8739	5.59504	7.17551	4.15926	6.64041	6.04137	5.03334	3.24714	4.97697	3.8918	6.48006	3.48797	4.57711	7.24124	5.67943	7.35226
BjuCDPK60	0	0	0	0	0	0	0	0	0	0	0.034676	0	0	0	0	0	0	0
BjuCDPK61	17.4437	5.24509	33.1558	3.9284	4.20042	2.5103	3.78674	5.78467	6.05997	5.85257	13.8065	8.00821	10.6355	10.6004	3.96806	16.8754	13.3345	9.46765
BjuCDPK62	9.353	5.38107	5.64821	7.99085	8.84779	7.89612	10.8868	7.31865	7.0901	4.19855	5.44444	8.24915	9.47328	9.19079	10.8281	6.68748	7.05017	10.9743
BjuCDPK63	2.70149	4.08603	1.4405	1.81069	2.82661	5.01274	4.20042	5.02379	3.09096	1.39597	0.68192	0.787606	2.73306	2.63644	3.38977	1.603	1.5405	2.65571
BjuCDPK64	56.4457	25.2299	57.576	35.4387	34.6902	25.1171	36.7587	35.5006	60.3308	26.7418	34.2612	38.2705	49.4252	43.5546	25.315	52.9328	43.9229	53.1314
BjuCDPK65	9.57755	2.67771	13.5563	0.003317	2.20729	1.45574	1.27219	2.10251	1.82891	4.29602	4.21519	5.81896	6.20762	6.35969	1.25456	10.0199	10.1048	6.17879
BjuCDPK66	0	0	0	0	0	0	0	0	0	0	0	0	0	0	0	0	0	0
BjuCDPK67	13.4898	4.99625	16.9861	15.4656	14.3342	6.45033	6.5302	8.58516	11.8633	11.471	13.0824	17.0772	11.3424	10.7922	5.56071	17.7033	14.1047	10.6718
BjuCDPK68	3.12882	0.476205	2.84642	0	0.191211	0	0.158306	0.902785	0.559489	0.471121	1.59404	0.924253	0.899151	0.505368	0.253157	1.14885	1.6856	0.370732
BjuCDPK69	2.75937	0.995699	3.69756	3.97323	2.92342	0.941698	1.77907	1.84678	1.68674	0.971086	4.56651	1.88584	2.87153	2.33664	1.3627	3.38619	3.35404	3.7755
BjuCDPK70	7.05307	1.36211	3.20732	4.10678	2.10598	3.14608	4.42899	3.07816	5.33774	4.52006	2.72567	4.08134	6.5934	5.07463	1.60573	9.49822	7.04135	8.40407
BjuCDPK71	11.6115	2.4458	19.4589	4.18851	3.34563	1.40311	3.51889	5.75274	4.82162	4.81636	14.4021	10.7888	7.47589	6.47421	2.91059	14.2141	14.2882	8.2387
BjuCDPK72	0	0	0	0	0	0	0	0	0	0	0	0	0	0	0	0	0	0
BjuCDPK73	0.096415	0	0.56216	0.160593	0.315473	0.175551	0.074802	0	0.076103	0.083258	0.57246	0.198878	0.040357	0	0.132543	0.623011	0.600856	0.232471
BjuCDPK74	0	0	0	0	0	0	0	0	0	0	0	0	0	0	0	0	0.048776	0
BjuCDPK75	1.00875	0.063716	1.94731	0.704668	0.299693	0.04313	0.061264	0.331699	0.328027	0.263966	2.93648	0.741586	0.974391	0.323205	0.078245	1.19751	3.5815	0.465512
BjuCDPK76	17.3098	3.37353	23.8409	4.52733	3.01599	1.50468	2.18962	6.11532	7.20213	20.5749	13.2188	31.3243	10.6283	7.16513	2.78884	16.9588	15.4609	6.6876
BjuCDPK77	51.979	26.3632	84.7333	33.3717	30.2299	35.8546	42.3114	35.2981	39.0452	51.1541	69.611	57.652	59.6446	55.0488	40.0732	74.2711	59.959	72.3841
BjuCDPK78	9.14087	5.29481	7.69832	9.39347	8.73051	4.6784	7.42939	5.92042	8.24597	3.79246	7.26192	4.54096	6.37363	8.3547	5.56957	8.3394	5.90367	6.88831
BjuCDPK79	2.25597	1.32902	1.65244	4.1287	2.78562	1.15876	0.935734	1.50739	1.88266	1.53466	1.08651	4.18336	1.02794	1.0519	0.919735	2.54976	1.93503	2.18757
BjuCDPK80	0	0.036559	0	0	0	0	0	0	0	0	0.113987	0	0	0	0	0	0	0.047415
BjuCDPK81	36.8012	17.9857	42.1348	25.2449	25.1588	13.1469	28.4854	34.1683	29.1868	20.8812	33.3735	25.8739	37.91	32.5909	19.5108	34.6356	41.0213	35.4615
BjuCDPK82	0	0	0.042671	0	0	0.041858	0.032036	0	0	0.032512	0.058515	0.112796	0	0	0.037989	0.098228	0.037522	0.067778
BjuCDPK83	0.105726	0	0.18581	0	0	0	0	0	0.166851	0.099645	0.201251	0	0.110606	0	0	0.054342	0.167493	0.166207
BjuCDPK84	11.1671	4.57307	14.1021	6.9318	7.74452	5.96915	6.92288	6.17659	4.92397	5.06426	9.0125	4.94563	7.78019	4.96012	5.56504	11.3829	9.58626	7.57221
BjuCDPK85	0.307437	0	0.251958	0	0	0	0	0.151149	0.172218	0	0.1283	0.163527	0.247805	0.040681	0.097865	0.141678	0.326927	0
BjuCDPK86	0	0	0	0	0.239041	0.10857	0.214481	0.115569	0	0	0	0.047981	0	0.156652	0.08343	0.044424	0	0.036286
BjuCDPK87	0	0.014769	0	0	0	0.042613	0	0.044039	0	0	0	0	0	0	0	0	0	0
BjuCDPK88	6.35431	2.89836	12.1962	1.31273	0.221711	0.506079	1.99181	1.9901	1.71311	1.92085	6.73752	3.26623	4.71466	2.73174	1.25736	8.10975	5.60059	4.60961
BjuCDPK89	7.1606	2.57955	11.0799	6.28219	7.13367	5.15482	4.7812	6.63736	6.40786	5.28876	6.60119	6.48541	6.29288	5.58961	4.05002	11.3523	8.69253	8.4114
BjuCDPK90	25.6671	14.466	59.4383	7.82144	6.93348	7.93728	28.7619	19.6622	12.9772	31.1605	26.8603	20.291	23.9474	25.3461	23.9277	38.7391	22.7993	53.1554
BjuCDPK91	33.1482	5.62599	59.2976	16.8288	10.908	10.1141	11.2699	18.1839	14.8783	14.7632	17.2089	16.5122	24.8494	16.4581	8.15848	29.499	40.0422	18.7578
BjuCDPK92	17.7693	11.4288	24.6327	9.03243	6.62001	5.52867	8.47352	10.0653	11.8475	19.446	19.0355	17.8775	15.6405	17.5606	7.00019	29.8896	23.4339	17.0527
BjuCDPK93	3.72318	0.843918	4.81277	1.74217	1.25618	0.436166	0.936378	2.61967	1.87508	0.937512	2.97241	1.76239	3.54303	1.2869	0.387761	2.77362	4.29224	2.58027
BjuCDPK94	0	0.033512	0	0	0	0	0	0.044626	0	0.047616	0.089088	0	0	0	0	0.054846	0	0.088497
BjuCDPK95	0.326024	0.18097	0	0.226102	0.466293	0.345252	1.3589	0.511211	0.298182	0.28907	0	0.293605	0.37341	0.347999	0.296197	0.719193	0	1.23124
BjuCDPK96	0	0	0.024735	0	0	0	0	0	0.024717	0.093729	0.045272	0.071018	0	0	0	0.31083	0	0
BjuCDPK97	0	0	0	0	0	0	0	0	0	0	0	0	0	0	0	0	0	0
BjuCDPK98	10.5843	9.34568	9.12157	4.73018	6.15536	4.99364	7.22331	9.18399	8.27472	5.99801	4.65617	5.72187	7.64954	6.88528	5.98537	10.4299	6.1701	8.06053
BjuCDPK99	1.23746	0.83602	0.888098	0.74202	1.00581	0.932963	1.22883	1.83337	1.34245	0.695091	0.38829	0.409117	0.902396	0.500553	0.569076	1.1243	0.879658	1.73559
BjuCDPK100	14.7708	6.13184	14.0814	10.6325	15.9034	8.28369	14.3015	10.3553	9.07784	4.04328	11.9496	5.64837	10.8893	10.8399	9.4335	8.60352	12.5947	11.5458
BjuCDPK101	9.06689	3.7925	14.9155	2.29077	3.42941	1.85749	7.5739	6.43351	2.36992	4.71785	16.3505	4.77948	6.72196	5.92739	3.79709	17.0831	12.474	11.1992
