# Supplementary material for: The CDPK Gene Family in Mustard (Brassica juncea L.): Genome-Wide Identification and Expression Analysis under Cold Stress
Source: Preprints.org preprint supplement (doi:10.20944/preprints202311.0465.v1), 2023-11-07
Supplement: Supplementary file 3 [file Table S1.xlsx]

## Sheet: Table S1
Table S1 Information of the primers used in this study
Gene	Locus	Primer	Sequence 5'-3'
BjuCDPK10	BjuVA02G46180	BjuCDPK10-qF	CATCTCCTCTCAGCCTTC
		BjuCDPK10-qR	TCCGTAATCAATCCTTCCAT
BjuCDPK13	BjuVA03G17280	BjuCDPK13-qF	GGCATCCTCCTCAAGTAT
		BjuCDPK13-qR	CTCTTCTTACATCCTCAACATC
BjuCDPK39	BjuVA09G10080	BjuCDPK39-qF	ACGAGCAGTATAGCATAGG
		BjuCDPK39-qR	GCAACAGGAAGAACCATC
BjuCDPK67	BjuVB03G26350	BjuCDPK67-qF	AGGTGTTGCTCTTGCTAT
		BjuCDPK67-qR	CAGTTAGACGCTTAGTAGGA
BjuCDPK68	BjuVB03G32820	BjuCDPK68-qF	GCGGTATCACTAACAACAAT
		BjuCDPK68-qR	TGTGTAATGTGGCTGCTA
BjuCDPK71	BjuVB03G55540	BjuCDPK71-qF	CTGTTCTGTCTCGTCTCA
		BjuCDPK71-qR	AGCCATATCTTCTCAATCCA
BjuCDPK75	BjuVB04G24300	BjuCDPK75-qF	GACTCCTAACATCCGTGAT
		BjuCDPK75-qR	CCTCCTAACATCCTCAACA
BjuCDPK76	BjuVB04G30740	BjuCDPK76-qF	TTCTTCGTGTAATTGCTGAG
		BjuCDPK76-qR	TGAGTTCCTGGTAAGTGATT
BjuCDPK90	BjuVB07G15980	BjuCDPK90-qF	CAGTAGTAGCAGCAGAAGA
		BjuCDPK90-qR	TATTCGTGGTCGTGGTAG
BjuCDPK96	BjuVB08G15990	BjuCDPK96-qF	GATAGCAGCGATAGTACAGA
		BjuCDPK96-qR	ATCCATCAGCATCTTCACT
TIP41	BjuVA01G04180	TIP41-qF	TAGCGGAGTTGTTGAGAA
		TIP41-qR	TGTCAGCCAGTTCATCTT
