# Supplementary material for: The CDPK Gene Family in Mustard (Brassica juncea L.): Genome-Wide Identification and Expression Analysis under Cold Stress
Source: Preprints.org preprint supplement (doi:10.20944/preprints202311.0465.v1), 2023-11-07
Supplement: Supplementary file 4 [file Table S2.xlsx]

## Sheet: Table S2
Table S2 Identification and characterization of CDPK family genes in Brassica juncea
Gene	Locus	Protein Length (aa)	MWs (kDa)	pI	GRAVY	Instability Index	Subcellular	No. of EF-Hands	N-Myristoylation	Palmitoylation
BjuCDPK1	BjuVA01G00070	483	54.1794	5.41138	-0.213458	37.2716	Cytoplasm	4	No	No
BjuCDPK2	BjuVA01G03310	545	61.2611	5.42877	-0.345505	40.6176	Cell membrane	4	Yes	Yes
BjuCDPK3	BjuVA01G13770	574	64.9929	5.71314	-0.517422	39.9113	Cell membrane	4	Yes	Yes
BjuCDPK4	BjuVA01G15500	525	58.7681	6.06008	-0.536762	38.1352	Cell membrane	4	Yes	Yes
BjuCDPK5	BjuVA02G04750	522	58.1075	5.6775	-0.464368	38.7152	Cell membrane	4	Yes	Yes
BjuCDPK6	BjuVA02G08740	534	60.116	6.07412	-0.441199	38.9569	Cell membrane	4	Yes	Yes
BjuCDPK7	BjuVA02G30090	520	58.6583	6.15682	-0.462692	37.0304	Cell membrane	4	Yes	Yes
BjuCDPK8	BjuVA02G46160	477	53.6563	4.83327	-0.284906	42.4327	Cytoplasm	4	No	No
BjuCDPK9	BjuVA02G46170	501	56.9076	6.16296	-0.317565	44.28	Cell membrane	4	No	No
BjuCDPK10	BjuVA02G46180	490	55.5693	5.13162	-0.405918	40.2153	Cytoplasm	4	No	No
BjuCDPK11	BjuVA03G01800	606	67.516	5.20852	-0.423597	44.1292	Cell membrane	4	Yes	Yes
BjuCDPK12	BjuVA03G05150	523	58.1976	5.66147	-0.468642	40.658	Cell membrane	4	Yes	Yes
BjuCDPK13	BjuVA03G17280	581	66.0399	6.35712	-0.436661	47.4575	Cell membrane	4	Yes	Yes
BjuCDPK14	BjuVA03G21350	566	62.8089	5.49476	-0.375442	40.527	Cell membrane	4	Yes	Yes
BjuCDPK15	BjuVA03G28020	500	56.3937	5.13321	-0.3716	46.8478	Cytoplasm	4	No	No
BjuCDPK16	BjuVA03G36000	651	72.9505	5.65545	-0.523656	39.9756	Cell membrane	3	Yes	Yes
BjuCDPK17	BjuVA03G40980	542	60.6381	5.71706	-0.506827	40.2886	Cell membrane	4	Yes	Yes
BjuCDPK18	BjuVA03G47920	508	57.1176	5.90076	-0.39252	39.8539	Cell membrane	4	Yes	Yes
BjuCDPK19	BjuVA03G53700	532	59.4739	6.22025	-0.513534	38.513	Cell membrane	4	Yes	Yes
BjuCDPK20	BjuVA03G63410	559	63.6137	6.93773	-0.566011	37.105	Cell membrane	2	Yes	Yes
BjuCDPK21	BjuVA04G07820	528	59.5585	6.50786	-0.419886	42.4093	Cell membrane	4	Yes	Yes
BjuCDPK22	BjuVA04G24310	580	66.2291	7.18322	-0.50431	43.2259	Cell membrane	4	Yes	Yes
BjuCDPK23	BjuVA04G31770	531	60.1454	7.62389	-0.413183	34.7358	Cell membrane	4	Yes	Yes
BjuCDPK24	BjuVA05G02550	532	60.2776	6.57249	-0.381203	35.3103	Cell membrane	4	Yes	Yes
BjuCDPK25	BjuVA05G13830	584	66.302	6.40902	-0.482192	43.6199	Cell membrane	4	Yes	Yes
BjuCDPK26	BjuVA05G23360	497	56.1306	5.22847	-0.354728	45.2785	Cytoplasm	4	No	No
BjuCDPK27	BjuVA05G38720	622	69.3421	5.29219	-0.469132	41.4503	Cell membrane	4	Yes	Yes
BjuCDPK28	BjuVA06G14590	574	64.4841	5.98937	-0.336063	34.2746	Cell membrane	4	Yes	Yes
BjuCDPK29	BjuVA06G32490	581	65.7009	9.33974	-0.64957	38.4974	Cell membrane	2	Yes	Yes
BjuCDPK30	BjuVA06G33110	539	60.5018	5.19482	-0.372171	41.5065	Cell membrane	4	Yes	Yes
BjuCDPK31	BjuVA06G33540	915	104.46	7.13877	-0.492568	41.6778	Nucleus	4	No	Yes
BjuCDPK32	BjuVA06G48370	534	60.2054	5.80095	-0.203745	40.6215	Cytoplasm	4	No	No
BjuCDPK33	BjuVA07G02940	577	65.3035	9.04267	-0.639515	39.3458	Cell membrane	2	Yes	Yes
BjuCDPK34	BjuVA07G17890	527	59.6201	8.63478	-0.489374	38.3351	Cell membrane	2	Yes	Yes
BjuCDPK35	BjuVA07G23700	538	60.7834	5.95328	-0.533086	40.0429	Cell membrane	4	Yes	Yes
BjuCDPK36	BjuVA07G40520	547	62.0545	6.34797	-0.416271	35.3611	Cell membrane	4	Yes	Yes
BjuCDPK37	BjuVA07G41500	552	62.7338	6.59562	-0.536413	37.7806	Cytoplasm	4	No	No
BjuCDPK38	BjuVA09G06610	486	54.9831	5.28906	-0.298765	43.0829	Cytoplasm	4	No	No
BjuCDPK39	BjuVA09G10080	540	60.9974	8.77539	-0.549815	41.4832	Cell membrane	2	Yes	Yes
BjuCDPK40	BjuVA09G11160	549	61.5552	5.18573	-0.328597	42.2341	Cell membrane	4	Yes	Yes
BjuCDPK41	BjuVA09G25700	738	83.544	6.03723	-0.410976	40.4992	Cell membrane	3	Yes	Yes
BjuCDPK42	BjuVA09G46860	541	61.3154	6.2526	-0.479852	36.9116	Cell membrane	4	Yes	Yes
BjuCDPK43	BjuVA09G52090	528	59.5054	6.25004	-0.419508	41.4458	Cell membrane	4	Yes	Yes
BjuCDPK44	BjuVA09G59500	547	61.9265	6.32382	-0.354296	31.836	Cell membrane	4	Yes	Yes
BjuCDPK45	BjuVA10G19540	494	55.7536	5.04738	-0.372874	43.4749	Cytoplasm	4	No	No
BjuCDPK46	BjuVA10G20500	534	60.164	5.87342	-0.450749	39.8659	Cell membrane	4	Yes	Yes
BjuCDPK47	BjuVA10G20580	517	57.6759	5.45048	-0.451451	40.9706	Cell membrane	4	Yes	Yes
BjuCDPK48	BjuVA10G25800	532	59.4661	5.87393	-0.427444	39.8162	Cell membrane	4	Yes	Yes
BjuCDPK49	BjuVA10G26090	522	57.9523	5.81982	-0.455364	36.4322	Cell membrane	4	Yes	Yes
BjuCDPK50	BjuVA10G31870	591	65.7691	5.4215	-0.393401	44.9452	Cell membrane	4	Yes	Yes
BjuCDPK51	BjuVB01G03500	531	60.1603	6.98093	-0.420904	34.2831	Cell membrane	4	Yes	Yes
BjuCDPK52	BjuVB01G05590	523	58.279	5.71291	-0.264245	44.2444	Cytoplasm	3	No	No
BjuCDPK53	BjuVB01G11310	580	66.0999	6.25709	-0.487586	41.7152	Cell membrane	4	Yes	Yes
BjuCDPK54	BjuVB01G43520	632	70.1679	5.36403	-0.483703	40.9701	Cell membrane	4	Yes	Yes
BjuCDPK55	BjuVB02G10390	547	61.3849	5.2877	-0.362157	41.4117	Cell membrane	4	Yes	Yes
BjuCDPK56	BjuVB02G10940	575	64.9482	9.33974	-0.610087	39.7291	Cell membrane	2	Yes	Yes
BjuCDPK57	BjuVB02G32050	534	60.0848	5.79993	-0.45824	40.6377	Cell membrane	4	Yes	Yes
BjuCDPK58	BjuVB02G32140	517	57.702	5.45048	-0.458027	40.4375	Cell membrane	4	Yes	Yes
BjuCDPK59	BjuVB02G37620	535	59.7344	5.8279	-0.421869	40.0682	Cell membrane	4	Yes	Yes
BjuCDPK60	BjuVB02G37920	523	58.0524	5.81982	-0.469216	37.2327	Cell membrane	4	Yes	Yes
BjuCDPK61	BjuVB02G43680	607	67.4681	5.24581	-0.391433	46.9544	Cell membrane	4	Yes	Yes
BjuCDPK62	BjuVB02G60860	528	59.4974	6.20593	-0.419886	41.9998	Cell membrane	4	Yes	Yes
BjuCDPK63	BjuVB02G63140	489	55.3713	5.19516	-0.38998	37.6769	Cytoplasm	4	No	No
BjuCDPK64	BjuVB02G67050	530	59.2657	6.13591	-0.5	38.7926	Cell membrane	4	Yes	No
BjuCDPK65	BjuVB02G73680	550	61.5783	5.49039	-0.32	37.9076	Cell membrane	4	Yes	Yes
BjuCDPK66	BjuVB02G74140	561	63.6467	6.3195	-0.507665	39.2499	Cell membrane	2	Yes	Yes
BjuCDPK67	BjuVB03G26350	547	61.9002	5.81926	-0.36819	32.3815	Cell membrane	4	Yes	Yes
BjuCDPK68	BjuVB03G32820	531	60.1802	5.43815	-0.330508	44.0761	Cytoplasm	4	No	No
BjuCDPK69	BjuVB03G47290	547	62.0264	6.24566	-0.416088	35.0863	Cell membrane	4	Yes	Yes
BjuCDPK70	BjuVB03G48710	552	62.7989	6.51974	-0.540942	38.0612	Cytoplasm	4	No	No
BjuCDPK71	BjuVB03G55540	543	60.8705	5.26985	-0.320994	38.5436	Cell membrane	4	Yes	Yes
BjuCDPK72	BjuVB03G56320	592	67.3118	9.06453	-0.593412	36.4544	Cell membrane	2	Yes	Yes
BjuCDPK73	BjuVB04G03010	488	55.3041	5.16913	-0.403689	44.7353	Cytoplasm	4	No	No
BjuCDPK74	BjuVB04G03020	419	47.2342	5.24615	-0.279952	42.2943	Cell membrane	4	No	No
BjuCDPK75	BjuVB04G24300	548	61.5461	5.14634	-0.34635	41.4706	Cell membrane	4	Yes	Yes
BjuCDPK76	BjuVB04G30740	553	62.3648	6.17615	-0.383363	32.9071	Cell membrane	4	Yes	Yes
BjuCDPK77	BjuVB05G02980	544	61.0257	5.38563	-0.347243	41.8616	Cell membrane	4	Yes	Yes
BjuCDPK78	BjuVB05G13370	528	59.0814	6.01802	-0.503788	40.1053	Cell membrane	4	Yes	Yes
BjuCDPK79	BjuVB05G14810	597	67.6368	5.90076	-0.536348	42.492	Cell membrane	4	Yes	Yes
BjuCDPK80	BjuVB05G24470	523	58.1666	5.72661	-0.457935	40.3629	Cell membrane	4	Yes	Yes
BjuCDPK81	BjuVB05G38750	559	63.2137	6.07554	-0.401431	39.7979	Cell membrane	4	Yes	Yes
BjuCDPK82	BjuVB05G38800	517	57.7259	5.56166	-0.496905	38.3466	Cell membrane	4	Yes	Yes
BjuCDPK83	BjuVB05G46370	443	49.7753	6.00847	-0.491648	32.2153	Cell membrane	3	Yes	Yes
BjuCDPK84	BjuVB05G46380	528	59.4671	6.34962	-0.489583	37.3466	Cell membrane	4	Yes	Yes
BjuCDPK85	BjuVB06G02260	530	60.0693	6.75886	-0.404717	33.7594	Cell membrane	4	Yes	Yes
BjuCDPK86	BjuVB06G20530	583	66.2129	6.54407	-0.491424	43.1983	Cell membrane	4	Yes	Yes
BjuCDPK87	BjuVB06G28340	521	58.435	5.93543	-0.436084	34.3831	Cell membrane	3	No	Yes
BjuCDPK88	BjuVB06G47380	539	61.0468	5.99449	-0.527829	39.7518	Cell membrane	4	Yes	Yes
BjuCDPK89	BjuVB07G10470	533	59.4738	5.82932	-0.492683	38.1381	Cell membrane	4	Yes	Yes
BjuCDPK90	BjuVB07G15980	543	61.3018	8.91167	-0.54291	38.8249	Cell membrane	2	Yes	Yes
BjuCDPK91	BjuVB07G19580	485	54.8961	5.24302	-0.291753	42.8986	Cytoplasm	4	No	No
BjuCDPK92	BjuVB07G27630	539	60.4299	5.6434	-0.508905	40.2388	Cell membrane	4	Yes	Yes
BjuCDPK93	BjuVB07G33160	631	69.9746	5.29924	-0.423455	37.6495	Cell membrane	4	Yes	Yes
BjuCDPK94	BjuVB08G03700	521	57.9764	5.60372	-0.467179	40.9837	Cell membrane	4	Yes	Yes
BjuCDPK95	BjuVB08G07420	518	58.2912	5.6526	-0.360811	35.31	Cell membrane	3	Yes	Yes
BjuCDPK96	BjuVB08G15990	550	62.4289	5.8412	-0.408182	43.8496	Cell membrane	4	Yes	Yes
BjuCDPK97	BjuVB08G20600	572	63.2363	5.50391	-0.371678	42.9072	Cell membrane	4	Yes	Yes
BjuCDPK98	BjuVB08G29050	500	56.3898	5.17129	-0.3652	45.7406	Cytoplasm	4	No	No
BjuCDPK99	BjuVB08G38930	529	60.3623	5.68745	-0.525898	28.8253	Cell membrane	4	Yes	Yes
BjuCDPK100	BjuVB08G51110	504	56.5021	5.70836	-0.341468	42.0496	Cell membrane	4	Yes	Yes
BjuCDPK101	BjuVB08G56360	540	61.4026	6.49575	-0.486111	37.3213	Cell membrane	4	Yes	Yes
