# Supplementary material for: The CDPK Gene Family in Mustard (Brassica juncea L.): Genome-Wide Identification and Expression Analysis under Cold Stress
Source: Preprints.org preprint supplement (doi:10.20944/preprints202311.0465.v1), 2023-11-07
Supplement: Supplementary file 5 [file Table S3.xlsx]

## Sheet: 1
Table S3 Ka/Ks values of duplicated BjuCDPK gene pairs
Gene1	Gene2	Ka	Ks	Ka/Ks ratio
BjuCDPK2	BjuCDPK32	0.117504	4.17835	0.0281222
BjuCDPK1	BjuCDPK32	0.00658666	0.210668	0.0312655
BjuCDPK11	BjuCDPK50	0.02246	0.664155	0.0338175
BjuCDPK18	BjuCDPK21	0.0146209	0.422548	0.0346018
BjuCDPK21	BjuCDPK43	0.0127477	0.306409	0.0416036
BjuCDPK18	BjuCDPK43	0.0179228	0.423216	0.0423491
BjuCDPK5	BjuCDPK49	0.0147609	0.339176	0.0435198
BjuCDPK2	BjuCDPK30	0.0577032	1.18114	0.0488539
BjuCDPK6	BjuCDPK46	0.0213996	0.437742	0.0488863
BjuCDPK12	BjuCDPK49	0.0198985	0.370692	0.0536795
BjuCDPK30	BjuCDPK40	0.0205505	0.370709	0.0554357
BjuCDPK58	BjuCDPK82	0.0230458	0.413142	0.0557816
BjuCDPK2	BjuCDPK40	0.0621547	1.06873	0.0581573
BjuCDPK11	BjuCDPK55	0.233381	3.93535	0.0593039
BjuCDPK50	BjuCDPK55	0.243512	4.06215	0.0599467
BjuCDPK57	BjuCDPK67	0.247352	4.08678	0.0605249
BjuCDPK5	BjuCDPK12	0.0144053	0.235435	0.061186
BjuCDPK68	BjuCDPK77	0.234711	3.80417	0.0616985
BjuCDPK27	BjuCDPK55	0.249124	3.97279	0.0627076
BjuCDPK18	BjuCDPK101	0.244333	3.83993	0.0636295
BjuCDPK28	BjuCDPK44	0.0290869	0.454859	0.0639472
BjuCDPK34	BjuCDPK39	0.0253999	0.39596	0.0641477
BjuCDPK21	BjuCDPK101	0.242036	3.73676	0.0647715
BjuCDPK43	BjuCDPK101	0.242196	3.70787	0.0653196
BjuCDPK9	BjuCDPK75	0.26622	4.00878	0.0664092
BjuCDPK14	BjuCDPK98	0.253768	3.79208	0.0669204
BjuCDPK16	BjuCDPK55	0.273196	4.06266	0.0672456
BjuCDPK52	BjuCDPK98	0.265636	3.71112	0.0715784
BjuCDPK22	BjuCDPK53	0.0167761	0.226074	0.0742061
BjuCDPK4	BjuCDPK19	0.0284272	0.377823	0.0752396
BjuCDPK5	BjuCDPK61	0.301214	3.89699	0.077294
BjuCDPK7	BjuCDPK80	0.265649	3.43221	0.0773989
BjuCDPK46	BjuCDPK96	0.282976	3.63843	0.0777742
BjuCDPK12	BjuCDPK61	0.300284	3.81048	0.0788048
BjuCDPK6	BjuCDPK96	0.288029	3.62652	0.0794231
BjuCDPK49	BjuCDPK61	0.294673	3.66992	0.080294
BjuCDPK27	BjuCDPK94	0.293116	3.62412	0.0808792
BjuCDPK20	BjuCDPK29	0.113375	1.39797	0.0810995
BjuCDPK50	BjuCDPK94	0.304807	3.72375	0.0818547
BjuCDPK16	BjuCDPK94	0.303476	3.70077	0.0820035
BjuCDPK35	BjuCDPK86	0.303105	3.691	0.08212
BjuCDPK55	BjuCDPK94	0.305089	3.68871	0.0827089
BjuCDPK3	BjuCDPK7	0.0983552	1.17965	0.0833763
BjuCDPK23	BjuCDPK51	0.0121589	0.145576	0.0835228
BjuCDPK51	BjuCDPK86	0.308251	3.65256	0.0843931
BjuCDPK3	BjuCDPK80	0.290304	3.42221	0.0848294
BjuCDPK24	BjuCDPK42	0.107896	1.25705	0.0858324
BjuCDPK64	BjuCDPK92	0.327595	3.80797	0.0860287
BjuCDPK64	BjuCDPK74	0.330045	3.82798	0.0862192
BjuCDPK56	BjuCDPK66	0.134505	1.55078	0.0867336
BjuCDPK23	BjuCDPK42	0.116063	1.33566	0.0868958
BjuCDPK42	BjuCDPK86	0.317031	3.60645	0.0879067
BjuCDPK11	BjuCDPK27	0.0978825	1.09676	0.0892473
BjuCDPK10	BjuCDPK64	0.336264	3.67345	0.0915391
BjuCDPK70	BjuCDPK68	0.327996	3.55345	0.0923037
BjuCDPK10	BjuCDPK92	0.359672	3.88679	0.0925372
BjuCDPK19	BjuCDPK79	0.323237	3.48377	0.0927836
BjuCDPK28	BjuCDPK36	0.0893758	0.959186	0.0931788
BjuCDPK4	BjuCDPK79	0.323293	3.46399	0.0933298
BjuCDPK42	BjuCDPK51	0.115992	1.21501	0.0954657
BjuCDPK24	BjuCDPK86	0.325508	3.40435	0.0956153
BjuCDPK29	BjuCDPK33	0.0337026	0.351737	0.0958176
BjuCDPK38	BjuCDPK92	0.368041	3.83747	0.0959074
BjuCDPK74	BjuCDPK92	0.338799	3.49728	0.0968749
BjuCDPK27	BjuCDPK50	0.0901817	0.929524	0.0970193
BjuCDPK6	BjuCDPK58	0.346087	3.54526	0.0976196
BjuCDPK11	BjuCDPK94	0.312104	3.19476	0.0976926
BjuCDPK61	BjuCDPK81	0.36088	3.64723	0.0989464
BjuCDPK37	BjuCDPK71	0.359752	3.62888	0.0991358
BjuCDPK23	BjuCDPK86	0.32314	3.25116	0.0993923
BjuCDPK4	BjuCDPK65	0.350233	3.52133	0.0994605
BjuCDPK23	BjuCDPK35	0.114815	1.14716	0.100086
BjuCDPK35	BjuCDPK42	0.042514	0.423916	0.100289
BjuCDPK41	BjuCDPK80	0.326987	3.18643	0.102619
BjuCDPK38	BjuCDPK64	0.356046	3.46838	0.102655
BjuCDPK36	BjuCDPK44	0.0840184	0.818124	0.102696
BjuCDPK20	BjuCDPK33	0.140452	1.35033	0.104013
BjuCDPK56	BjuCDPK72	0.0402408	0.385935	0.104268
BjuCDPK46	BjuCDPK82	0.367476	3.50382	0.104879
BjuCDPK44	BjuCDPK77	0.369839	3.51175	0.105315
BjuCDPK31	BjuCDPK64	0.372127	3.52516	0.105563
BjuCDPK46	BjuCDPK58	0.367807	3.48031	0.105682
BjuCDPK12	BjuCDPK81	0.365311	3.39947	0.107461
BjuCDPK6	BjuCDPK82	0.373353	3.46136	0.107863
BjuCDPK19	BjuCDPK65	0.37367	3.44968	0.10832
BjuCDPK5	BjuCDPK81	0.377602	3.45905	0.109164
BjuCDPK66	BjuCDPK72	0.146364	1.33013	0.110038
BjuCDPK17	BjuCDPK93	0.362029	3.27475	0.110552
BjuCDPK57	BjuCDPK73	0.387838	3.50462	0.110665
BjuCDPK13	BjuCDPK25	0.0504524	0.453136	0.111341
BjuCDPK80	BjuCDPK85	0.361474	3.24309	0.11146
BjuCDPK70	BjuCDPK77	0.39187	3.48175	0.11255
BjuCDPK28	BjuCDPK77	0.401972	3.57117	0.11256
BjuCDPK35	BjuCDPK51	0.1134	1.00604	0.112719
BjuCDPK62	BjuCDPK94	0.376053	3.32497	0.1131
BjuCDPK50	BjuCDPK62	0.364647	3.22079	0.113217
BjuCDPK49	BjuCDPK81	0.372829	3.28815	0.113385
BjuCDPK36	BjuCDPK77	0.395031	3.4718	0.113783
BjuCDPK28	BjuCDPK68	0.39252	3.44818	0.113834
BjuCDPK31	BjuCDPK92	0.381343	3.32913	0.114547
BjuCDPK11	BjuCDPK62	0.368453	3.21239	0.114697
BjuCDPK23	BjuCDPK24	0.0484159	0.421313	0.114917
BjuCDPK16	BjuCDPK50	0.121865	1.05541	0.115466
BjuCDPK36	BjuCDPK68	0.391209	3.36871	0.11613
BjuCDPK48	BjuCDPK60	0.387723	3.33518	0.116252
BjuCDPK67	BjuCDPK73	0.393649	3.36202	0.117087
BjuCDPK2	BjuCDPK76	0.400436	3.41086	0.1174
BjuCDPK30	BjuCDPK76	0.395407	3.36788	0.117405
BjuCDPK2	BjuCDPK78	0.386645	3.26923	0.118268
BjuCDPK26	BjuCDPK69	0.395029	3.31494	0.119166
BjuCDPK40	BjuCDPK76	0.403661	3.38102	0.11939
BjuCDPK23	BjuCDPK89	0.410334	3.41785	0.120056
BjuCDPK27	BjuCDPK62	0.389769	3.14134	0.124077
BjuCDPK47	BjuCDPK83	0.40225	3.22452	0.124747
BjuCDPK44	BjuCDPK68	0.403633	3.2343	0.124798
BjuCDPK65	BjuCDPK79	0.390707	3.12453	0.125045
BjuCDPK51	BjuCDPK89	0.398322	3.17834	0.125324
BjuCDPK47	BjuCDPK59	0.382351	3.04899	0.125402
BjuCDPK18	BjuCDPK63	0.403365	3.15381	0.127897
BjuCDPK63	BjuCDPK101	0.417948	3.23336	0.129261
BjuCDPK5	BjuCDPK95	0.400083	3.05638	0.130901
BjuCDPK55	BjuCDPK62	0.414412	3.1655	0.130915
BjuCDPK61	BjuCDPK95	0.421502	3.21608	0.131061
BjuCDPK43	BjuCDPK63	0.417979	3.14669	0.132831
BjuCDPK16	BjuCDPK62	0.403844	3.03729	0.132962
BjuCDPK3	BjuCDPK85	0.418919	3.13777	0.133509
BjuCDPK31	BjuCDPK38	0.0565743	0.423366	0.13363
BjuCDPK21	BjuCDPK63	0.415567	3.09555	0.134246
BjuCDPK58	BjuCDPK96	0.393063	2.91729	0.134736
BjuCDPK82	BjuCDPK96	0.40244	2.95513	0.136183
BjuCDPK49	BjuCDPK95	0.425911	3.12561	0.136265
BjuCDPK35	BjuCDPK89	0.44585	3.23975	0.137619
BjuCDPK84	BjuCDPK100	0.414231	3.00982	0.137626
BjuCDPK16	BjuCDPK27	0.0616533	0.44656	0.138063
BjuCDPK15	BjuCDPK99	0.43499	3.12999	0.138975
BjuCDPK36	BjuCDPK70	0.445687	3.20452	0.139081
BjuCDPK42	BjuCDPK89	0.450319	3.22348	0.1397
BjuCDPK44	BjuCDPK70	0.446309	3.17856	0.140413
BjuCDPK24	BjuCDPK51	0.0540294	0.384445	0.140539
BjuCDPK11	BjuCDPK16	0.150342	1.06836	0.140722
BjuCDPK12	BjuCDPK95	0.417954	2.96988	0.140731
BjuCDPK28	BjuCDPK70	0.452044	3.12794	0.144518
BjuCDPK7	BjuCDPK85	0.441143	3.04754	0.144754
BjuCDPK22	BjuCDPK87	0.464895	3.14406	0.147865
BjuCDPK87	BjuCDPK97	0.465896	3.14997	0.147905
BjuCDPK41	BjuCDPK85	0.443147	2.94302	0.150576
BjuCDPK25	BjuCDPK87	0.472349	3.11441	0.151666
BjuCDPK13	BjuCDPK97	0.4722	3.08227	0.153199
BjuCDPK33	BjuCDPK91	0.488125	3.00876	0.162235
BjuCDPK13	BjuCDPK87	0.49863	3.03497	0.164295
BjuCDPK25	BjuCDPK97	0.498658	2.95785	0.168588
BjuCDPK33	BjuCDPK73	0.509808	2.90834	0.175292
BjuCDPK29	BjuCDPK73	0.516461	2.86595	0.180206
BjuCDPK41	BjuCDPK100	0.491112	2.7234	0.18033
BjuCDPK90	BjuCDPK93	0.53449	2.88001	0.185586
BjuCDPK93	BjuCDPK90	0.53449	2.88001	0.185586
BjuCDPK72	BjuCDPK78	0.516313	2.7669	0.186604
BjuCDPK10	BjuCDPK31	0.0810674	0.432409	0.187479
BjuCDPK40	BjuCDPK72	0.548665	2.88621	0.190099
BjuCDPK17	BjuCDPK90	0.550208	2.8817	0.190932
BjuCDPK59	BjuCDPK83	0.510621	2.66325	0.191729
BjuCDPK2	BjuCDPK66	0.53723	2.80155	0.191762
BjuCDPK14	BjuCDPK52	0.0753572	0.391517	0.192475
BjuCDPK40	BjuCDPK66	0.541678	2.81242	0.192602
BjuCDPK2	BjuCDPK72	0.547464	2.83275	0.193262
BjuCDPK30	BjuCDPK72	0.554182	2.85159	0.194341
BjuCDPK8	BjuCDPK38	0.106346	0.542478	0.196037
BjuCDPK30	BjuCDPK66	0.54273	2.75845	0.196752
BjuCDPK38	BjuCDPK74	0.109592	0.551704	0.198642
BjuCDPK39	BjuCDPK91	0.551444	2.74202	0.201108
BjuCDPK2	BjuCDPK56	0.559944	2.76624	0.20242
BjuCDPK31	BjuCDPK74	0.0790101	0.388973	0.203125
BjuCDPK30	BjuCDPK56	0.566734	2.73828	0.206967
BjuCDPK66	BjuCDPK78	0.555039	2.62786	0.211213
BjuCDPK40	BjuCDPK56	0.574898	2.70526	0.212511
BjuCDPK29	BjuCDPK57	0.574489	2.66937	0.215216
BjuCDPK33	BjuCDPK67	0.567719	2.61918	0.216755
BjuCDPK33	BjuCDPK57	0.576812	2.65704	0.217088
BjuCDPK20	BjuCDPK73	0.545311	2.50575	0.217624
BjuCDPK88	BjuCDPK90	0.561495	2.51714	0.223068
BjuCDPK34	BjuCDPK91	0.580659	2.56361	0.226501
BjuCDPK29	BjuCDPK67	0.578726	2.54138	0.227722
BjuCDPK72	BjuCDPK76	0.592075	2.49828	0.236994
BjuCDPK20	BjuCDPK57	0.626149	2.55106	0.245447
BjuCDPK56	BjuCDPK76	0.601746	2.44374	0.24624
BjuCDPK81	BjuCDPK95	0.106698	0.430392	0.247909
BjuCDPK20	BjuCDPK67	0.63117	2.41457	0.261401
BjuCDPK10	BjuCDPK74	0.110255	0.231538	0.476187
