# Supplementary material for: The CDPK Gene Family in Mustard (Brassica juncea L.): Genome-Wide Identification and Expression Analysis under Cold Stress
Source: Preprints.org preprint supplement (doi:10.20944/preprints202311.0465.v1), 2023-11-07
Supplement: Supplementary file 7 [file Table S5.xlsx]

## Sheet: string_interactions_short
Table S5 Protein-protein interaction network prediction of BjuCDPKs
Node1	Node2	node1_string_id	node2_string_id	phylogenetic cooccurrence	homology	coexpression	experimentally determined interaction	automated textmining	combined score
BjuCDPK84	SLAH3	3702.AT4G04720.1	3702.AT5G24030.1	0	0	0	0.798	0.93	0.985
BjuCDPK68	DI19	3702.AT1G35670.1	3702.AT1G56280.1	0	0	0	0.799	0.914	0.982
BjuCDPK84	OZS1	3702.AT4G04720.1	3702.AT1G12480.1	0	0	0	0.597	0.954	0.981
ABF4	BjuCDPK101	3702.AT3G19290.3	3702.AT3G57530.1	0	0	0	0.501	0.938	0.968
BjuCDPK75	OZS1	3702.AT2G17290.1	3702.AT1G12480.1	0	0	0	0.597	0.92	0.966
ABF1	BjuCDPK68	3702.AT1G49720.2	3702.AT1G35670.1	0	0	0	0.799	0.801	0.958
ABF1	BjuCDPK98	3702.AT1G49720.2	3702.AT4G09570.1	0	0	0	0.543	0.884	0.944
BjuCDPK78	OZS1	3702.AT4G23650.1	3702.AT1G12480.1	0	0	0	0.499	0.873	0.933
BjuCDPK98	DI19	3702.AT4G09570.1	3702.AT1G56280.1	0	0	0	0.746	0.716	0.924
ABF4	BjuCDPK98	3702.AT3G19290.3	3702.AT4G09570.1	0	0	0	0.543	0.825	0.916
ABF4	BjuCDPK68	3702.AT3G19290.3	3702.AT1G35670.1	0	0	0	0.543	0.791	0.9
BjuCDPK101	BjuCDPK34	3702.AT3G57530.1	3702.AT5G66210.1	0.434	0.888	0.859	0	0.719	0.876
ABF4	BjuCDPK76	3702.AT3G19290.3	3702.AT1G18890.1	0	0	0	0.5	0.747	0.868
ABF4	BjuCDPK69	3702.AT3G19290.3	3702.AT1G74740.1	0	0	0	0.5	0.722	0.855
BjuCDPK52	SLAH3	3702.AT2G38910.1	3702.AT5G24030.1	0	0	0	0.602	0.637	0.849
BjuCDPK54	SLAH3	3702.AT3G10660.1	3702.AT5G24030.1	0	0	0	0.602	0.621	0.843
ABF1	BjuCDPK101	3702.AT1G49720.2	3702.AT3G57530.1	0	0	0	0.5	0.637	0.81
ABF4	BjuCDPK91	3702.AT3G19290.3	3702.AT5G23580.1	0	0	0	0.543	0.593	0.806
BjuCDPK75	SLAH3	3702.AT2G17290.1	3702.AT5G24030.1	0	0	0	0	0.75	0.75
ABF1	BjuCDPK91	3702.AT1G49720.2	3702.AT5G23580.1	0	0	0	0.543	0.465	0.745
BjuCDPK91	DI19	3702.AT5G23580.1	3702.AT1G56280.1	0	0	0	0.5	0.463	0.72
BjuCDPK78	SLAH3	3702.AT4G23650.1	3702.AT5G24030.1	0	0	0	0	0.685	0.685
BjuCDPK65	OZS1	3702.AT4G35310.1	3702.AT1G12480.1	0	0	0	0	0.68	0.68
BjuCDPK68	OZS1	3702.AT1G35670.1	3702.AT1G12480.1	0	0	0	0	0.637	0.637
BjuCDPK58	SLAH3	3702.AT5G19360.1	3702.AT5G24030.1	0	0	0	0	0.63	0.63
BjuCDPK98	OZS1	3702.AT4G09570.1	3702.AT1G12480.1	0	0	0	0	0.626	0.626
ABF1	BjuCDPK69	3702.AT1G49720.2	3702.AT1G74740.1	0	0	0	0	0.617	0.617
ABF1	BjuCDPK76	3702.AT1G49720.2	3702.AT1G18890.1	0	0	0	0	0.616	0.616
ABF1	BjuCDPK58	3702.AT1G49720.2	3702.AT5G19360.1	0	0	0	0	0.598	0.598
BjuCDPK101	OZS1	3702.AT3G57530.1	3702.AT1G12480.1	0	0	0	0	0.598	0.598
ABF4	BjuCDPK84	3702.AT3G19290.3	3702.AT4G04720.1	0	0	0	0	0.595	0.595
BjuCDPK82	SLAH3	3702.AT5G12180.1	3702.AT5G24030.1	0	0	0	0	0.593	0.593
ABF4	OZS1	3702.AT3G19290.3	3702.AT1G12480.1	0	0	0	0	0.592	0.592
ABF4	BjuCDPK75	3702.AT3G19290.3	3702.AT2G17290.1	0	0	0	0	0.592	0.592
BjuCDPK95	OZS1	3702.AT5G19450.2	3702.AT1G12480.1	0	0	0	0	0.584	0.584
BjuCDPK95	SLAH3	3702.AT5G19450.2	3702.AT5G24030.1	0	0	0	0	0.583	0.583
ABF1	BjuCDPK75	3702.AT1G49720.2	3702.AT2G17290.1	0	0	0	0	0.581	0.581
ABF4	DI19	3702.AT3G19290.3	3702.AT1G56280.1	0	0	0.1	0	0.549	0.576
ABF4	BjuCDPK61	3702.AT3G19290.3	3702.AT5G04870.1	0	0	0	0	0.569	0.569
BjuCDPK65	SLAH3	3702.AT4G35310.1	3702.AT5G24030.1	0	0	0	0	0.569	0.569
ABF1	BjuCDPK78	3702.AT1G49720.2	3702.AT4G23650.1	0	0	0	0	0.563	0.563
ABF4	BjuCDPK78	3702.AT3G19290.3	3702.AT4G23650.1	0	0	0	0	0.548	0.548
BjuCDPK101	DI19	3702.AT3G57530.1	3702.AT1G56280.1	0	0	0	0	0.548	0.548
BjuCDPK68	SLAH3	3702.AT1G35670.1	3702.AT5G24030.1	0	0	0	0	0.544	0.544
BjuCDPK76	OZS1	3702.AT1G18890.1	3702.AT1G12480.1	0	0	0	0	0.544	0.544
BjuCDPK68	BjuCDPK96	3702.AT1G35670.1	3702.AT2G31500.1	0.444	0.939	0	0.501	0.828	0.538
ABF1	ABF4	3702.AT1G49720.2	3702.AT3G19290.3	0	0.958	0	0.5	0.96	0.52
ABF1	BjuCDPK84	3702.AT1G49720.2	3702.AT4G04720.1	0	0	0	0	0.52	0.52
ABF4	BjuCDPK58	3702.AT3G19290.3	3702.AT5G19360.1	0	0	0	0	0.52	0.52
ABF1	OZS1	3702.AT1G49720.2	3702.AT1G12480.1	0	0	0	0	0.519	0.519
BjuCDPK58	OZS1	3702.AT5G19360.1	3702.AT1G12480.1	0	0	0	0	0.519	0.519
BjuCDPK98	SLAH3	3702.AT4G09570.1	3702.AT5G24030.1	0	0	0	0	0.519	0.519
BjuCDPK32	DI19	3702.AT4G38230.2	3702.AT1G56280.1	0	0	0	0	0.465	0.465
ABF4	BjuCDPK59	3702.AT3G19290.3	3702.AT5G12480.1	0	0	0	0	0.461	0.461
BjuCDPK75	BjuCDPK76	3702.AT2G17290.1	3702.AT1G18890.1	0.441	0.939	0.397	0	0.9	0.444
ABF1	BjuCDPK59	3702.AT1G49720.2	3702.AT5G12480.1	0	0	0	0	0.441	0.441
BjuCDPK72	DI19	3702.AT2G17890.1	3702.AT1G56280.1	0	0	0	0	0.441	0.441
BjuCDPK87	OZS1	3702.AT1G50700.1	3702.AT1G12480.1	0	0	0	0	0.431	0.431
BjuCDPK76	DI19	3702.AT1G18890.1	3702.AT1G56280.1	0	0	0	0	0.43	0.43
BjuCDPK96	SLAH3	3702.AT2G31500.1	3702.AT5G24030.1	0	0	0	0	0.43	0.43
